# Supplementary material for: A novel dual-tone molecular glass resist based on adamantane derivatives for electron beam lithography
Source: Royal Society of Chemistry journal article supplement (doi:10.1039/d2tc01339h), 2022-01-01
Supplement: d2tc01339h1.pdf [file d2tc01339h1.pdf]

## Supporting information

# A Novel Dual-tone Molecular Glass Resist Based on Adamantane Derivatives for Electron Beam Lithography

Shengwen Hu,<sup>a,c</sup> Jinping Chen,<sup>\*a</sup> Tianjun Yu,<sup>a</sup> Yi Zeng,<sup>a,c</sup> Shuangqing Wang,<sup>b</sup> Xudong Guo,<sup>b</sup> Guoqiang Yang,<sup>\*b,c</sup> and

Yi Li<sup>\*a,c</sup>

<sup>a</sup> Key Laboratory of Photochemical Conversion and Optoelectronic Materials, Technical Institute of Physics and Chemistry, Chinese Academy of Sciences, Beijing 100190, China

<sup>b</sup> Beijing National Laboratory for Molecular Sciences (BNLMS), Key laboratory of Photochemistry, Institute of Chemistry, Chinese Academy of Sciences, Beijing 100190, China

<sup>c</sup> University of Chinese Academy of Sciences, Beijing 100049, China

\*Corresponding Authors E-mail: chenjp@mail.ipc.ac.cn; yili@mail.ipc.ac.cn; gqyang@iccas.ac.cn

### Table of Contents

S1 Synthesis of materials

S2 NMR, FT-IR and HR-MS spectra of compounds

S3 The solubility of AD-10Boc and AD-10OH

S4 The SEM image of AD-10Boc film.

S5 The lithographic patterns of AD-10Boc resist under different developing time

S6 The AFM images of AD-10Boc resist upon the exposure of EBL

S7 The Patterning properties of 950k PMMA

## S1 Synthesis of materials

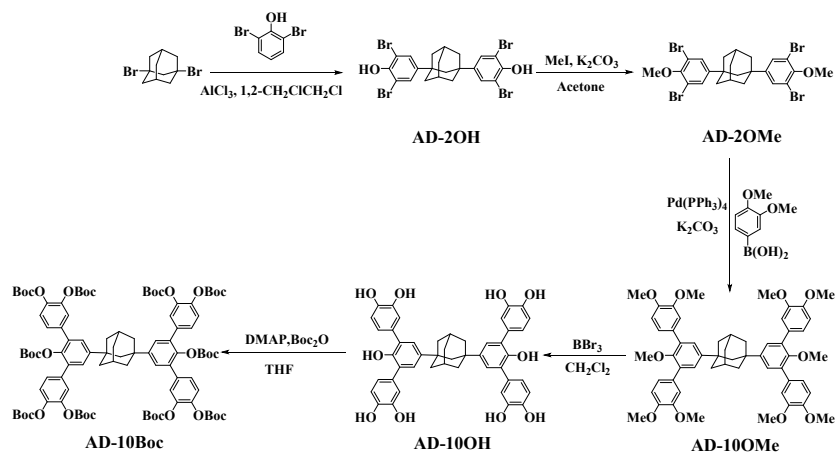

**Scheme S1.** The synthesis procedures of AD-10Boc

### 1.1 Synthesis of AD-2OH

A 250-mL two-neck round-bottom flask was fitted with a magnetic stirrer, a nitrogen inlet and an outlet running to an alkaline liquid. 2,6-dibromophenol (19 g, 75 mmol), 1,3-dibromoadamantane (8.89 g, 30 mmol) and anhydrous 1, 2-dichloroethane (30 mL) were added into the flask placed in an ice-bath. And then the powder of anhydrous aluminum chloride (1.3 g, 0.9 mmol) was added in four portions over 20 minutes to the chilled, stirring solution. The mixture was kept in an ice-bath for 6 hours and then quenched with acidic water. Through filtering, the precipitates were obtained and washed by dichloromethane for three times. Upon recrystallization from acetone, A white solid was isolated: 11.3g (57.8%).  $^1\text{H}$  NMR (400 MHz, Chloroform-*d*)  $\delta$  7.42 (s, 4H, benzene), 5.75 (s, 2H, Ar-OH), 2.32 (s, 2H, adamantane), 1.87 (s, 10H, adamantane), 1.75 (s, 2H, adamantane). HRMS (ESI)  $m/z$ :  $[\text{M}-\text{H}]^-$  calcd for  $\text{C}_{22}\text{H}_{19}\text{Br}_4\text{O}_2^-$  634.8083, found 634.8079.

### 1.2 Synthesis of AD-2OMe

AD-2OH (15 g, 23 mmol), potassium carbonate (15.9 g, 115 mmol), iodomethane (21g, 115mmol) and anhydrous acetone (80 mL) were added to a 250-mL schlenk flask. Then the mixture was refluxed at 60  $^\circ\text{C}$  and stirred until complete conversion. The mixture was diluted with dichloromethane and washed with

brine. The organic layer was separated, dried over anhydrous sodium sulfate, filtered and then concentrated under reduced pressure. After removing the solvent, a white solid was obtained: (15.3 g, 95%).  $^1\text{H}$  NMR (400 MHz, Chloroform-*d*)  $\delta$  7.47 (s, 4H, benzene), 3.87 (s, 6H, methoxy), 2.33 (s, 2H, adamantane), 1.91 – 1.84 (m, 10H, adamantane), 1.76 (s, 2H, adamantane). HRMS (ESI)  $m/z$ :  $[\text{M}-\text{CH}_3]^-$  calcd for  $\text{C}_{23}\text{H}_{21}\text{Br}_4\text{O}_2^-$  648.8240, found 648.8240.

### 1.3 Synthesis of AD-10OMe

AD-2OMe (15.3 g, 23 mmol), 3,4-dimethoxyphenylboronic acid (21 g, 115 mmol), tetrakis-(triphenylphosphine)palladium (265.8 mg, 0.23 mmol) and 1,4-dioxane (60 mL) were added to a 250-mL schlenk flask. The mixture was degassed and then potassium carbonate (15.9 g, 115 mmol) dissolved in water (60 mL) was injected under nitrogen. The mixture was then refluxed at 110 °C for 8 hours. After the reaction was completed, the mixture was cooled to room temperature, diluted with dichloromethane and washed with brine. The organic layer was separated, dried over anhydrous sodium sulfate, filtered and then concentrated under reduced pressure. The crude products were purified by column chromatography on silica gel (dichloromethane /methanol = 60:1, v/v) to obtain AD-10OMe as a white solid (19 g, 95%).  $^1\text{H}$  NMR (400 MHz, Chloroform-*d*)  $\delta$  7.30 (s, 4H, benzene), 7.18 (s, 4H, benzene), 7.10 (d,  $J = 8.2$  Hz, 4H, benzene), 6.94 (d,  $J = 8.0$  Hz, 4H, benzene), 3.92 (d,  $J = 7.8$  Hz, 24H, methoxy), 3.23 (s, 6H, methoxy), 2.35 (s, 2H, adamantane), 2.11 (s, 2H, adamantane), 2.07 – 1.98 (m, 8H, adamantane), 1.80 (s, 2H, adamantane). HRMS (ESI)  $m/z$ :  $[\text{M}+\text{Na}]^+$  calcd for  $\text{C}_{56}\text{H}_{60}\text{O}_{10}\text{Na}^+$  915.4078, found 915.4079.

### 1.4 Synthesis of AD-10OH

AD-10MeO (2.0 g, 2.2 mmol) and dichloromethane (30 mL) were added to a 250-mL two-necked flask and cooled to -78 °C with a dry ice/acetone cooling bath. Then boron tribromide (3.8 g, 15.4 mmol) dissolved in dichloromethane (30 mL) was slowly introduced through a dropping funnel for 30 min. After

addition, the reaction mixture was stirred for 6 hours at room temperature and quenched by slow addition of water (10 mL) to give a white precipitate. The precipitate was filtered and washed with water and dichloromethane thoroughly to give the product AD-10OH as a white solid (1.6 g, 95%). <sup>1</sup>H NMR (400 MHz, DMSO-*d*<sub>6</sub>) δ 8.87 (d, *J* = 21.6 Hz, 8H, Ar-OH), 7.63 (s, 2H, Ar-OH), 7.04 (s, 4H, benzene), 6.92 (s, 4H, benzene), 6.76 (s, 8H, benzene), 2.24 (s, 2H, adamantane), 2.07 – 1.89 (m, 6H, adamantane), 1.84 (d, *J* = 11.2 Hz, 4H, adamantane), 1.72 (s, 2H, adamantane). HRMS (ESI) *m/z*: [M-H]<sup>-</sup> calcd for C<sub>46</sub>H<sub>39</sub>O<sub>10</sub><sup>-</sup> 751.2549, found 751.2545.

### 1.5 Synthesis of AD-10Boc

AD-10OH (1.6 g, 2.1 mmol), Boc<sub>2</sub>O (6.9 g, 31.5 mmol), 4-dimethylaminopyridine (51.2 mg, 0.42 mmol) and tetrahydrofuran (30 mL) were added to a 100-mL flask. Then the mixture was heated at 50 °C for 8 hours. After the reaction was completed, the mixture was cooled to room temperature, diluted with dichloromethane and washed with brine. The organic layer was separated, dried over anhydrous sodium sulfate, filtered and then concentrated under reduced pressure. The crude products were purified by column chromatography on silica gel (petroleum ether/ethyl acetate=6:1, v/v) to obtain AD-10Boc as a white spumescient solid (3 g, 81.1%). <sup>1</sup>H NMR (400 MHz, Chloroform-*d*) δ 7.38 (s, 4H, benzene), 7.34 (d, *J* = 8.3 Hz, 8H, benzene), 7.29 (d, *J* = 8.6 Hz, 4H, benzene), 2.35 (s, 2H, adamantane), 2.05 - 1.94 (m, 10H, adamantane), 1.78 (s, 2H, adamantane), 1.54 (d, *J* = 6.5 Hz, 72H, -OC(CH<sub>3</sub>)<sub>3</sub>), 1.18 (s, 18H, -OC(CH<sub>3</sub>)<sub>3</sub>). <sup>13</sup>C NMR (101 MHz, CDCl<sub>3</sub>) δ 151.02, 150.60, 150.53, 148.54, 143.02, 142.12, 141.96, 136.40, 133.82, 127.33, 127.26, 123.90, 122.86, 83.63, 83.53, 83.37, 42.10, 37.39, 29.45, 27.65, 27.12. FT-IR (KBr): 2981.7, 2932.8, 1768.5, 1507.4, 1395.9, 1371.2, 1286.0, 1256.5, 1154.4, 1113.3, 1049.8, 1013.1, 891.8, 831.2, 773.7, 737.0. HRMS (ESI) *m/z*: [M+Na]<sup>+</sup> calcd for C<sub>96</sub>H<sub>120</sub>O<sub>30</sub>Na<sup>+</sup> 1776.7790, found 1776.7740.

## S2 NMR, FT-IR and HR-MS spectra of compounds

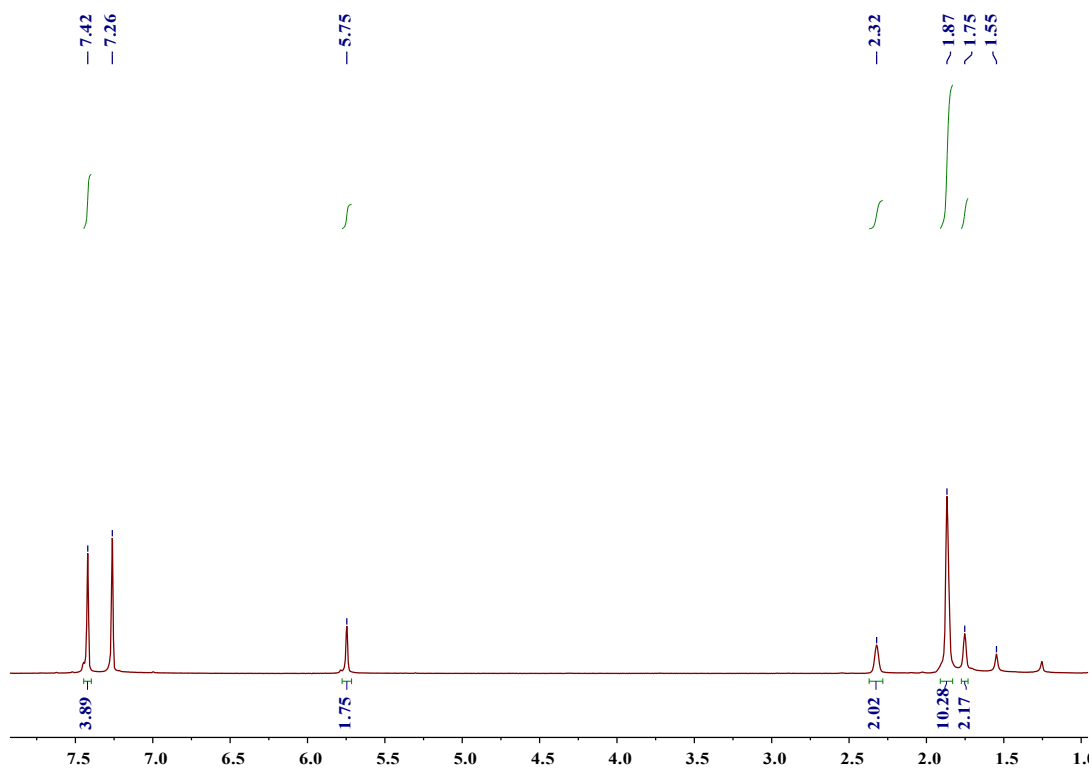

Figure S1. <sup>1</sup>H NMR (400 MHz, CDCl<sub>3</sub>) spectrum of AD-2OH.

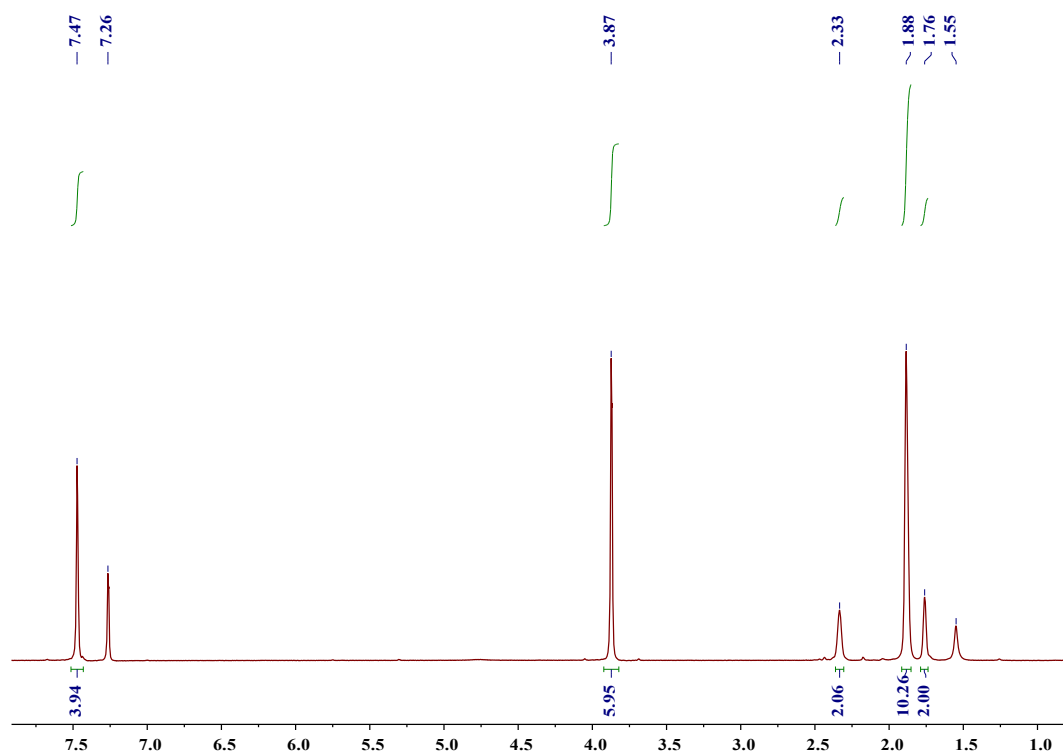

Figure S2. <sup>1</sup>H NMR (400 MHz, CDCl<sub>3</sub>) spectrum of AD-2OMe.

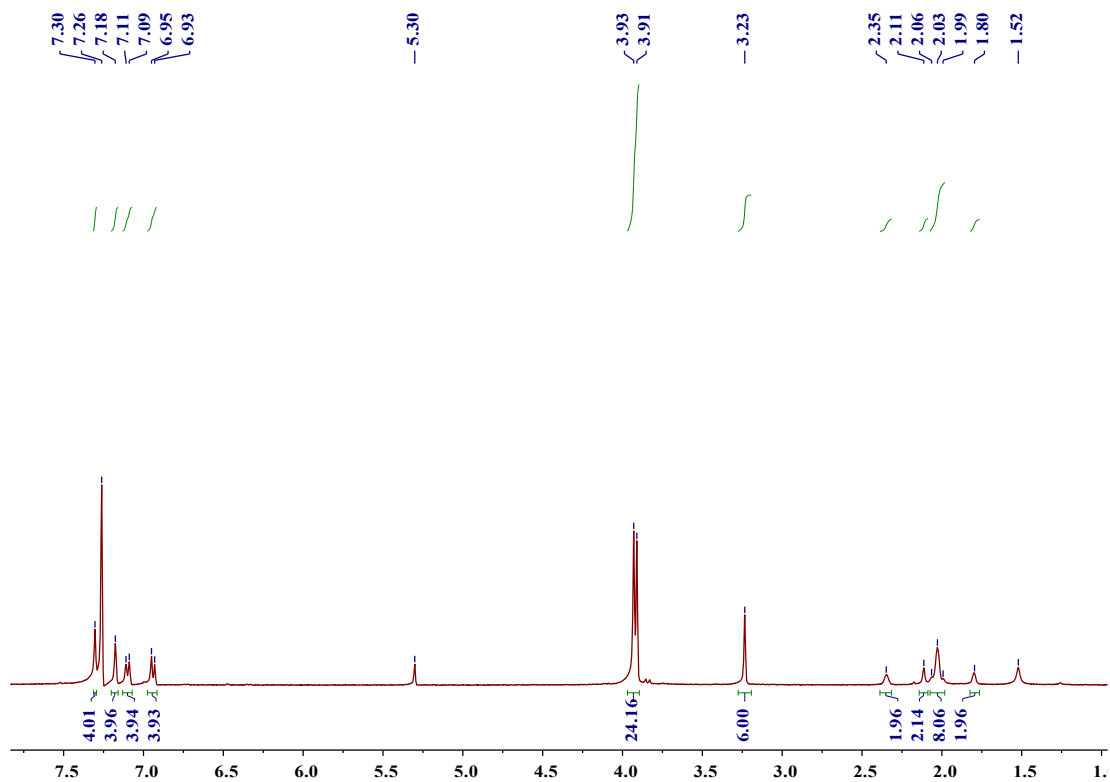

**Figure S3.**  $^1\text{H}$  NMR (400 MHz,  $\text{CDCl}_3$ ) spectrum of AD-10OMe.

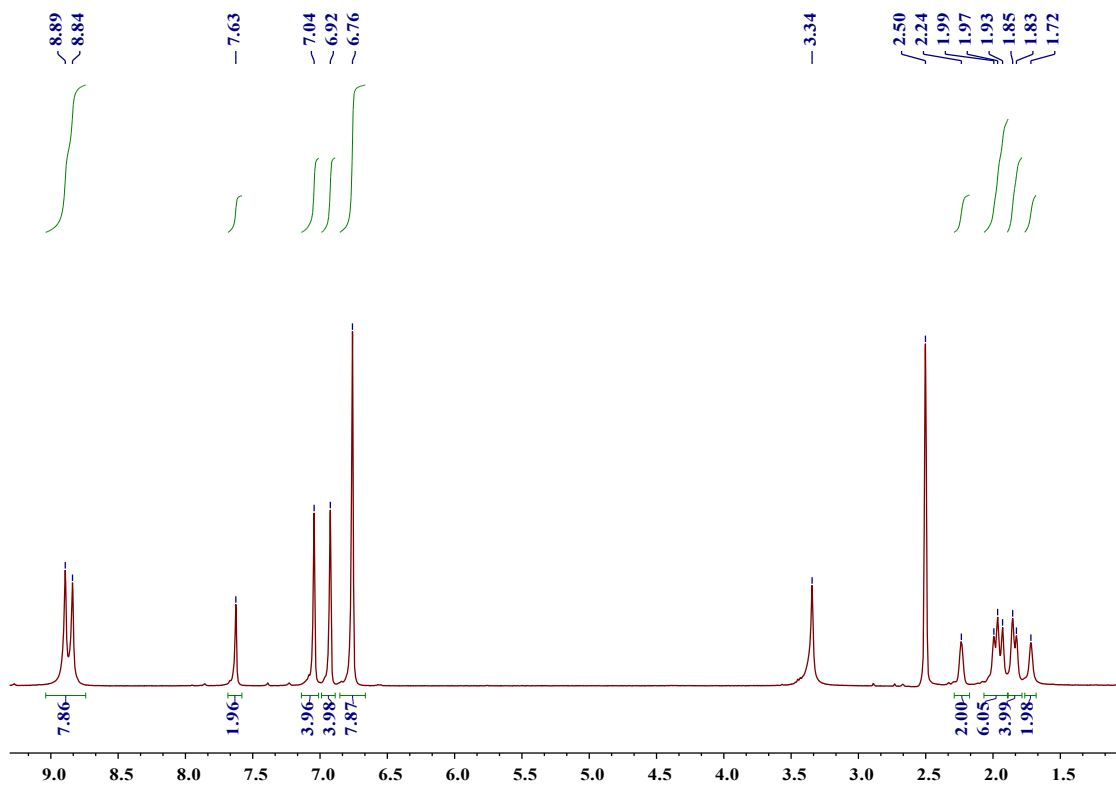

**Figure S4.**  $^1\text{H}$  NMR (400 MHz,  $\text{DMSO}-d_6$ ) spectrum of AD-10OH.

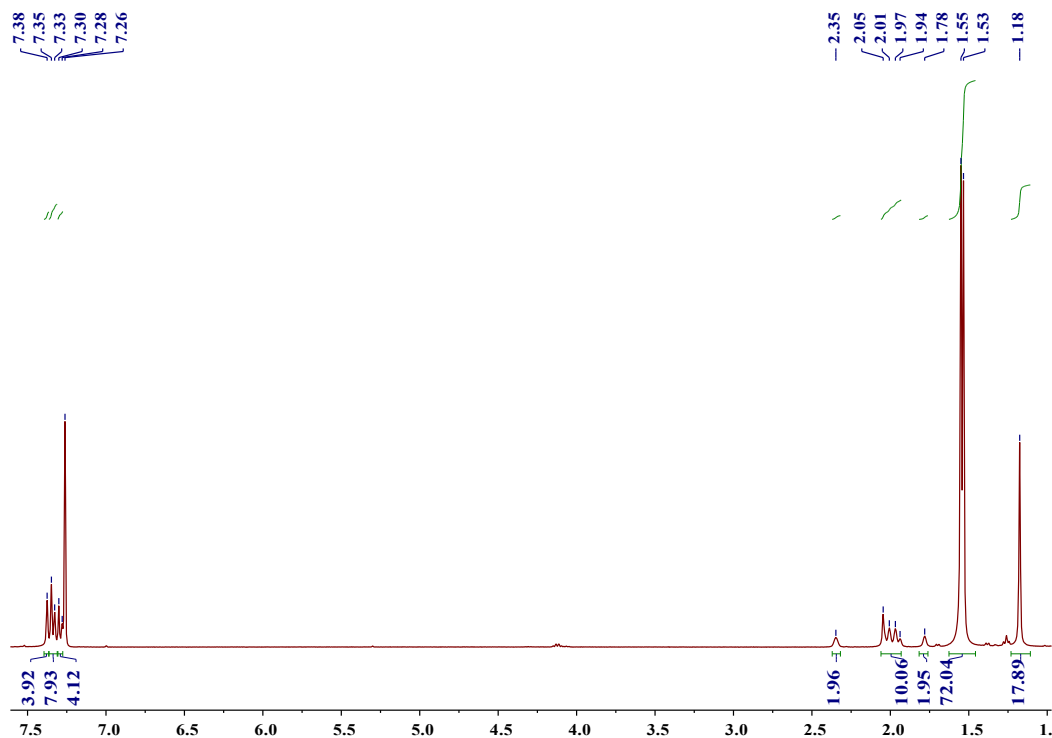

**Figure S5.**  $^1\text{H}$  NMR (400 MHz,  $\text{CDCl}_3$ ) spectrum of AD-10Boc.

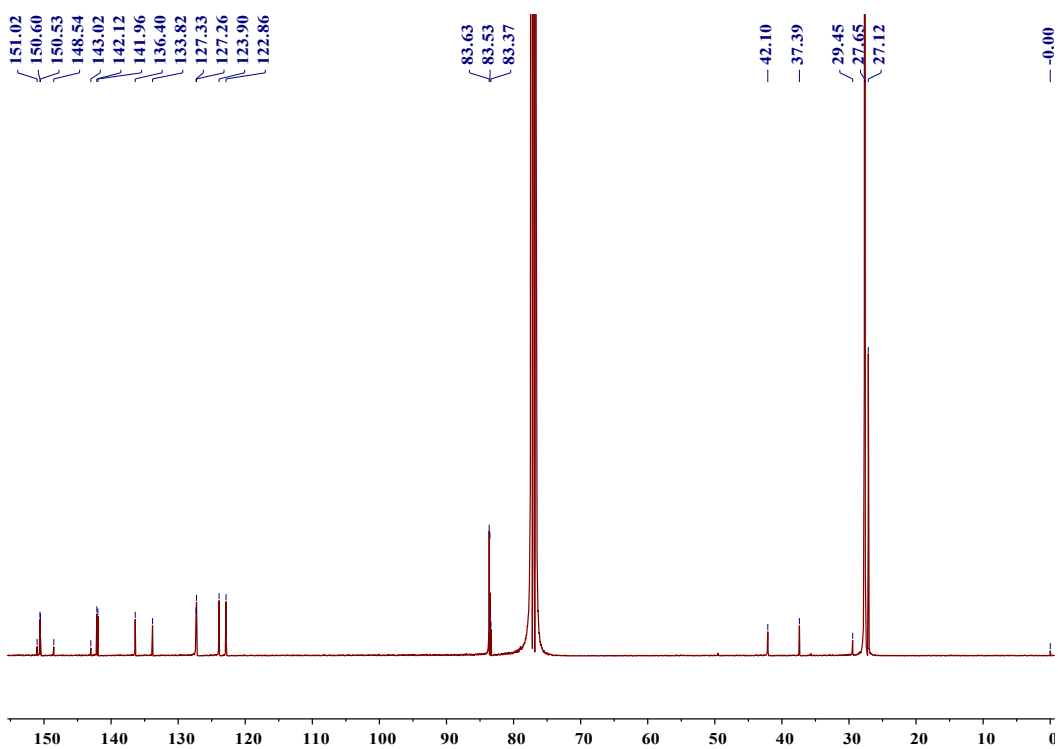

**Figure S6.**  $^{13}\text{C}$  NMR (400 MHz,  $\text{CDCl}_3$ ) spectrum of AD-10Boc.

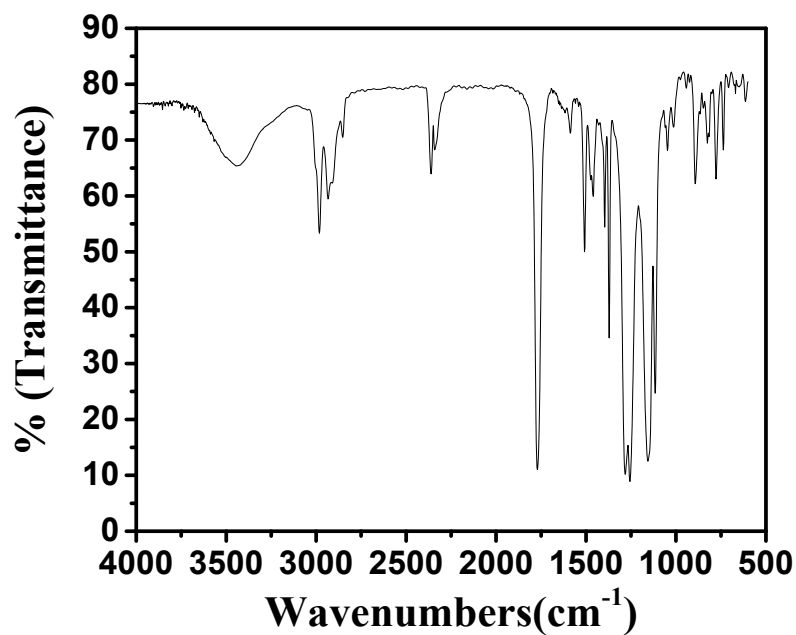

Figure S7. FT-IR spectrum of AD-10Boc.

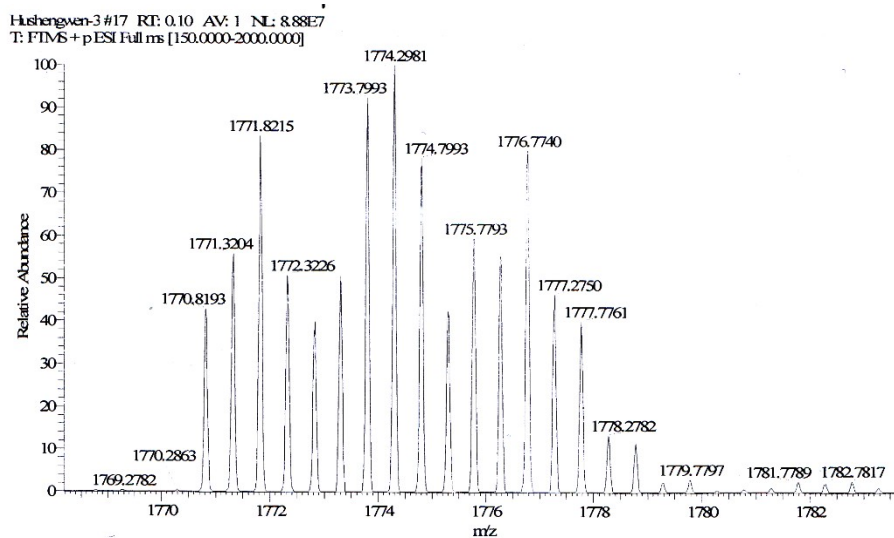

Figure S8. HR-ESI spectrum of AD-10Boc.



### **S3 The solubility of AD-10Boc and AD-10OH**

Table S1 Solubility of AD-10OH and AD-10Boc

| Solvent              | AD-10OH | AD-10Boc |
|----------------------|---------|----------|
| Water                | -       | -        |
| DMSO                 | ++      | ++       |
| Ethanol              | ++      | ++       |
| THF                  | ++      | ++       |
| Acetone              | ++      | ++       |
| Ethyl acetate        | ++      | ++       |
| Dichloromethane      | -       | ++       |
| PGMEA                | ++      | ++       |
| Toluene              | -       | ++       |
| Cyclohexanone        | ++      | ++       |
| Chlorocyclohexane    | -       | ++       |
| Anisole              | -       | ++       |
| n-Hexane             | -       | ++       |
| cyclohexane          | -       | ++       |
| 2.38wt%TMAH solution | ++      | -        |

++: soluble at room temperature; +/-: partly soluble; -: insoluble

### **S4 The SEM image of AD-10Boc film**

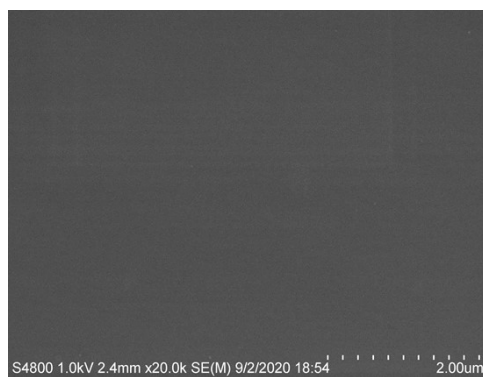

**Figure S9.** SEM image of AD-10Boc film.

### S5 The lithographic patterns of AD-10Boc resist under different developing times

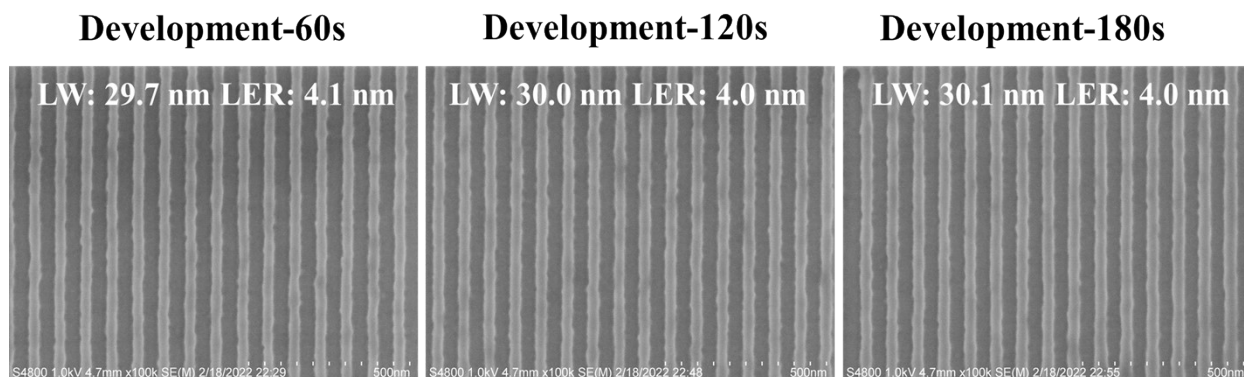

**Figure S10.** High-resolution SEM images of line-space patterns (top view) for AD-10Boc resist at different developing times (Developing times: 60, 120 and 180 s).

### S6 The AFM images of AD-10Boc resist upon the exposure of EBL

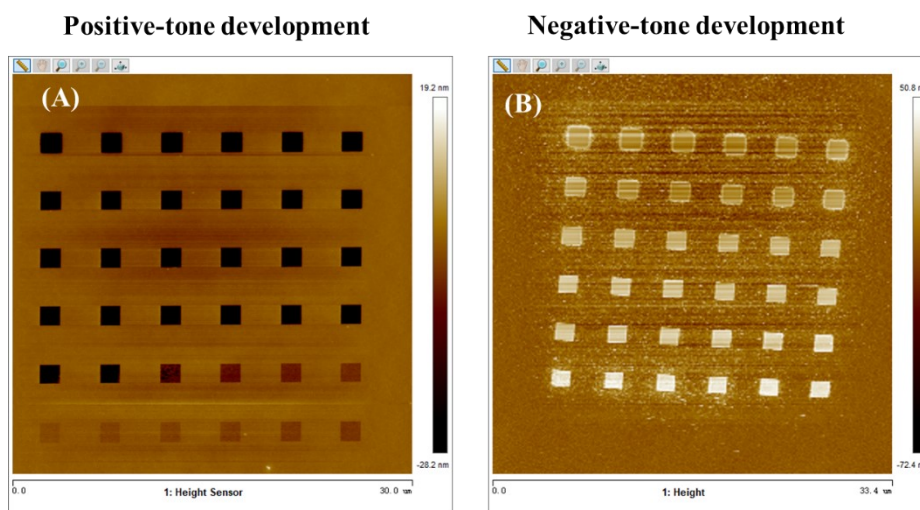

**Figure S11.** Atomic force micrograph of AD-10Boc resist patterns at different exposure doses. (A) Positive-tone development, (B) Negative-tone development

## S7 The Patterning properties of 950k PMMA

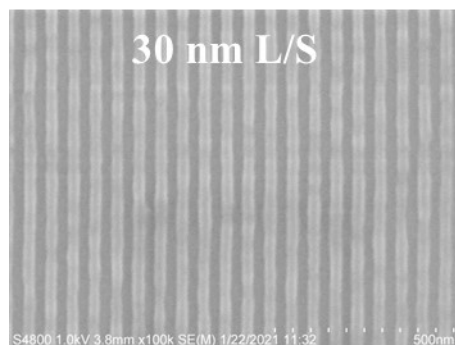

**Dose: 740 $\mu$ C/cm<sup>2</sup>**

**LER: 3.0 nm**

**Figure S12.** High-resolution e-beam patterning image of 950k PMMA\*

\* The exposure parameter settings of 950k PMMA is the same as that of AD-10Boc resist.

The Z-parameter for 950k PMMA is  $1.80 \times 10^{-6} \mu\text{C} \cdot \text{nm}^3$ .
